# Supplementary material for: Health-Related Quality of Life and Experiences of Brazilian Celiac Individuals over the Course of the Sars-Cov-2 Pandemic
Source: MDPI journal article supplement (doi:10.3390/nu13051582), 2021-05-09
Supplement: s1 [file s1]

**Table S1.** Socioeconomic, demographic, and health-related results of the study sample.

| Gender           | Age            | Age at CD diagnosis | Marital status          | Educational level              | Occupation                               | Adherence to the GFD | Antidepressants | COVID-19      | Children ≤18 y in the house | Family member with COVID-19          |
|------------------|----------------|---------------------|-------------------------|--------------------------------|------------------------------------------|----------------------|-----------------|---------------|-----------------------------|--------------------------------------|
| Women<br>(n=631) | ≤39<br>(n=405) | ≤39<br>(n=512)      | No partner<br>(n=397)   | High school at most<br>(n=109) | Self-employed/private company<br>(n=335) | Always<br>(n=597)    | Yes (n=145)     | Yes (n=42)    | Yes<br>(n=284)              | Yes: live together<br>(n=51)         |
| Men<br>(n=43)    | ≥40<br>(n=264) | ≥40<br>(n=162)      | With partner<br>(n=275) | College degree<br>(n=258)      | Public agency<br>(n=153)                 | Not always<br>(n=77) | No (n=526)      | No<br>(n=631) | No<br>(n=387)               | Yes: do not live together<br>(n=179) |
|                  |                |                     |                         | Postgraduate degree<br>(n=307) | Student<br>(n=80)                        |                      |                 |               |                             | No (n=444)                           |
|                  |                |                     |                         |                                | Retired/unemployed<br>(n=86)             |                      |                 |               |                             |                                      |

\* Not all variables add up to 674 responses, as some participants did not answer all the questions

**Table S2.** Comparison between the application of the CDQ QoL questionnaire before and during the Sars-Cov-2 pandemic.

|                  | Before COVID (n = 449) [1] | During COVID (n = 674) | p **   |
|------------------|----------------------------|------------------------|--------|
|                  | Mean (SD) *                | Mean (SD) *            |        |
| Emotions         | 26.66 (9.07)               | 25.69 (8.88)           | 0.082  |
| Social           | 31.15 (8.43)               | 34.68 (8.26)           | <0.001 |
| Worries          | 27.22 (10.38)              | 34.67 (10.18)          | <0.001 |
| Gastrointestinal | 34.77 (10.13)              | 29.65 (9.92)           | <0.001 |
| Total Score      | 119.80 (31.19)             | 124.68 (30.56)         | 0.011  |

\* Estimated marginal means adjusted by gender, age, age at CD diagnosis, marital status, educational level, occupation, and adherence to the GFD and antidepressants.\*\* One-way ANCOVA controlling by gender, age, age at CD diagnosis, marital status, educational level, occupation, adherence to the GFD, and antidepressants.  $p < 0.05$  was considered statistically significant.

1. Pratesi, C.; Häuser, W.; Uenishi, R.; Selleski, N.; Nakano, E.; Gandolfi, L.; Pratesi, R.; Zandonadi, R. Quality of Life of Celiac Patients in Brazil: Questionnaire Translation, Cultural Adaptation and Validation. *Nutrients* **2018**, *10*, 1167, doi:10.3390/nu10091167.
